# Supplementary material for: Feature-Optimized Machine Learning Benchmarking for Protein Interface Prediction in Permanent Homodimer Complexes with Distinct Structural Features
Source: Research Square preprint supplement (doi:10.21203/rs.3.rs-8559148/v1), 2026-02-02
Supplement: Supplementary file 1 [file 4b4fc1dea9f965ce1640a72c.docx]

SUPPLEMENTARY MATERIAL

Feature-Optimized Machine Learning Benchmarking for Protein Interface Prediction in Permanent Homodimer Complexes with Distinct Structural Features

Tayyip Topuz1,2, Zeki Erdem3,4, Halil Bisgin4, E. Demet Akten5*

*1School of Graduate Studies, Ph.D. Program of Computer Engineering, Kadir Has University, 34083, Fatih, Istanbul, Turkey*

*2Core Program, Kadir Has University, 34083, Fatih, Istanbul, Turkey*

*3Department of Computer Engineering, Faculty of Engineering and Natural Sciences, Kadir Has University, 34083, Fatih, Istanbul, Turkey*

*4Computer Science Department, College of Innovation and Technology, University of Michigan-Flint, Flint, MI, USA*

*5Department of Molecular Biology and Genetics, Faculty of Engineering and Natural Sciences, Kadir Has University, 34083, Fatih, Istanbul, Turkey*

*Corresponding Author

[demet.akten@khas.edu.tr](mailto:demet.akten@khas.edu.tr)

tel. +90 212 533 65 32 (x1350)

fax. +90 212 631 91 50

<https://orcid.org/0000-0002-0358-3171>


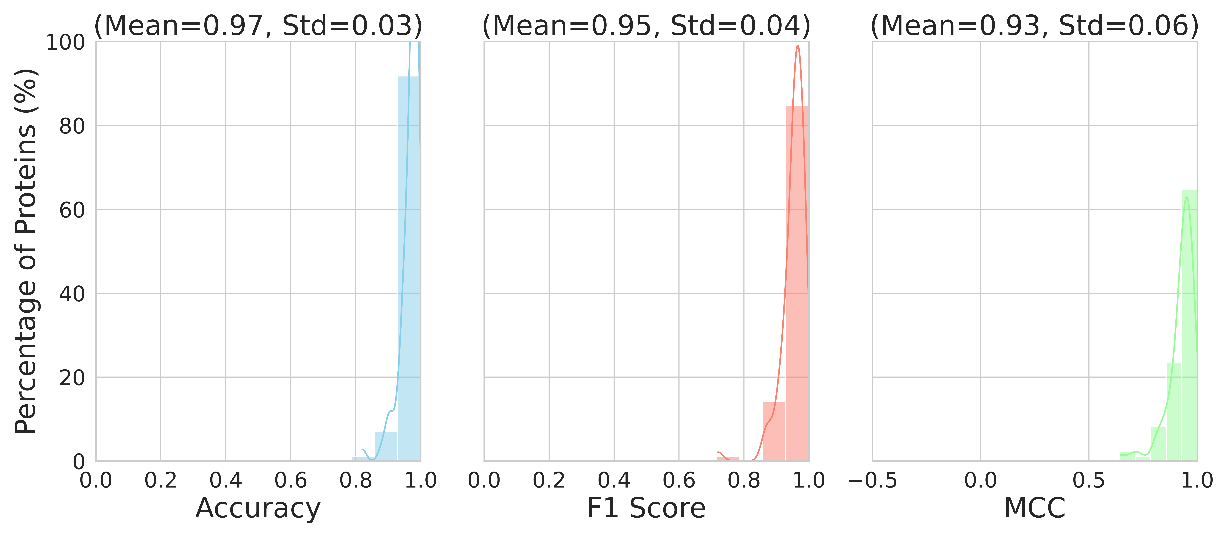


(a)


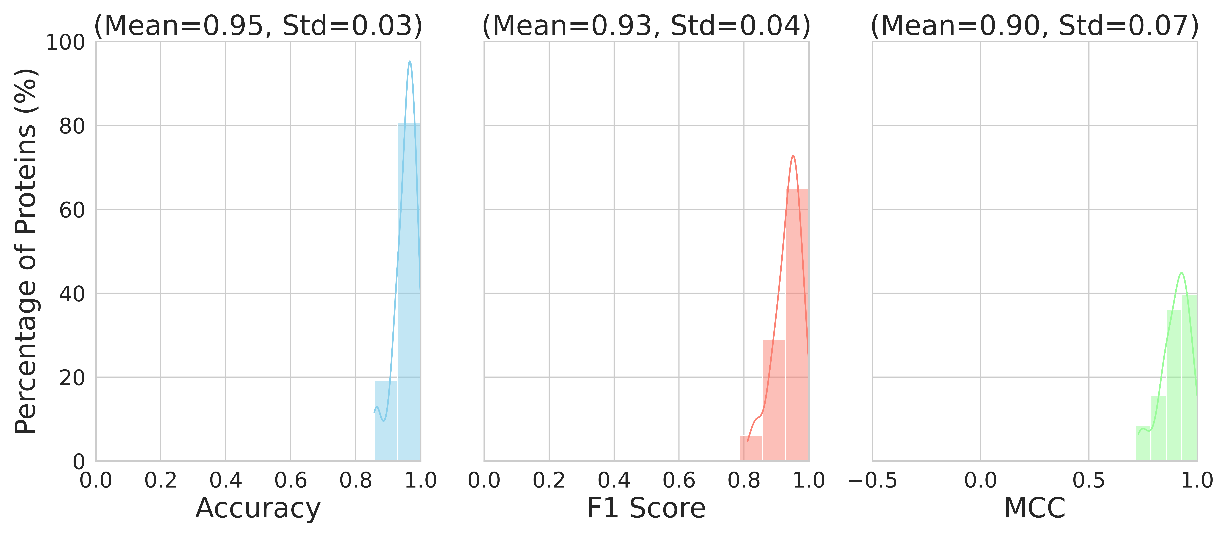


(b)


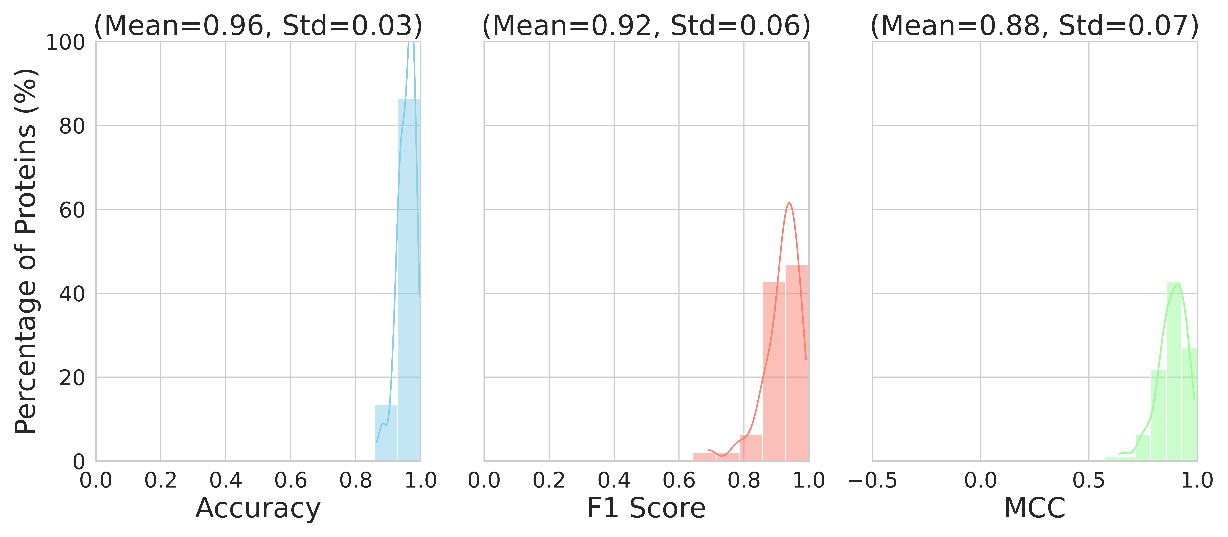


(c)

**Supplementary Figure 1** α MLP model with minimal feature set on test sets (a) α, (b) β, (c) Mem


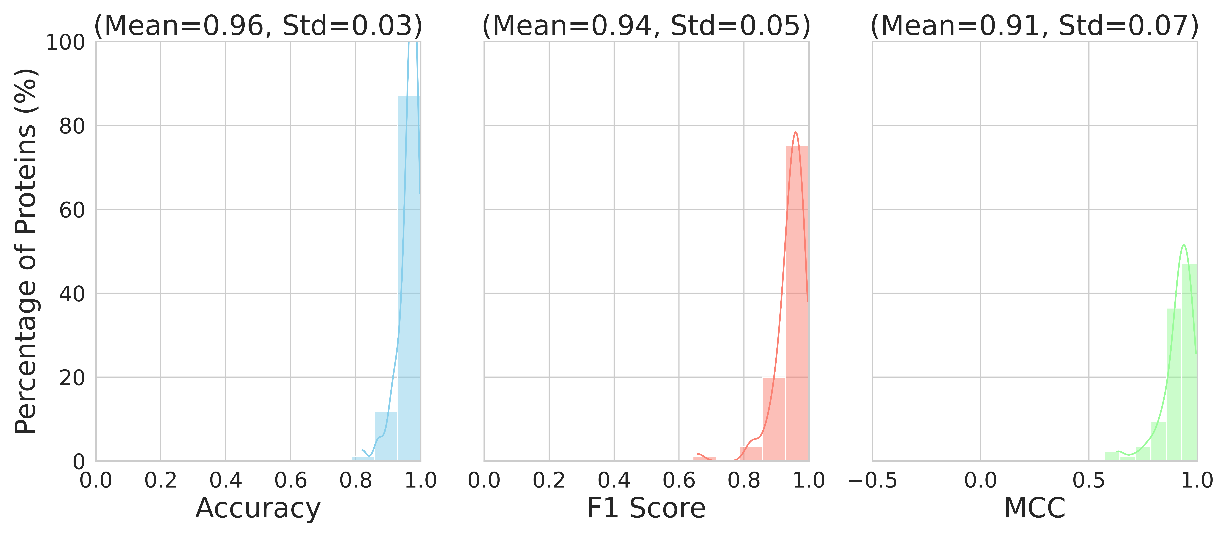


(a)


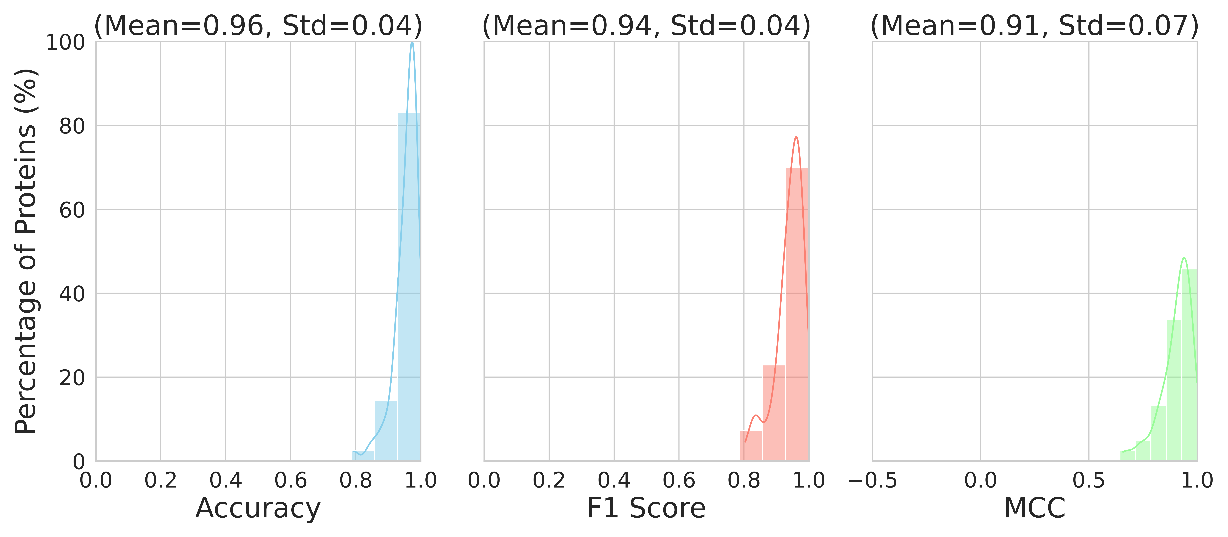


(b)


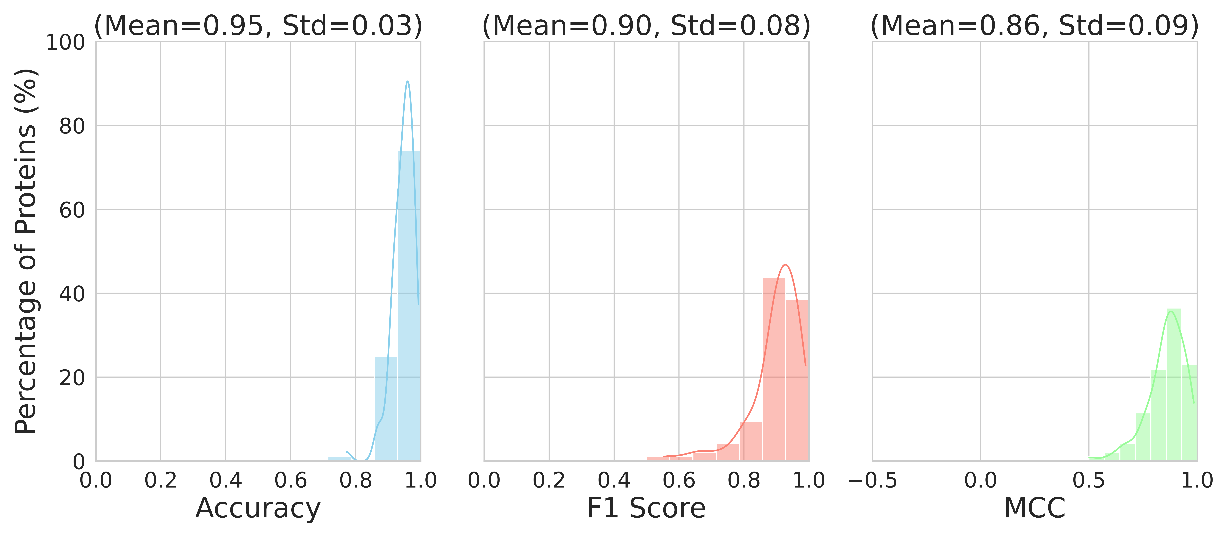


(c)

**Supplementary Figure 2** β MLP model with minimal feature set on test sets (a) α, (b) β, (c) Mem


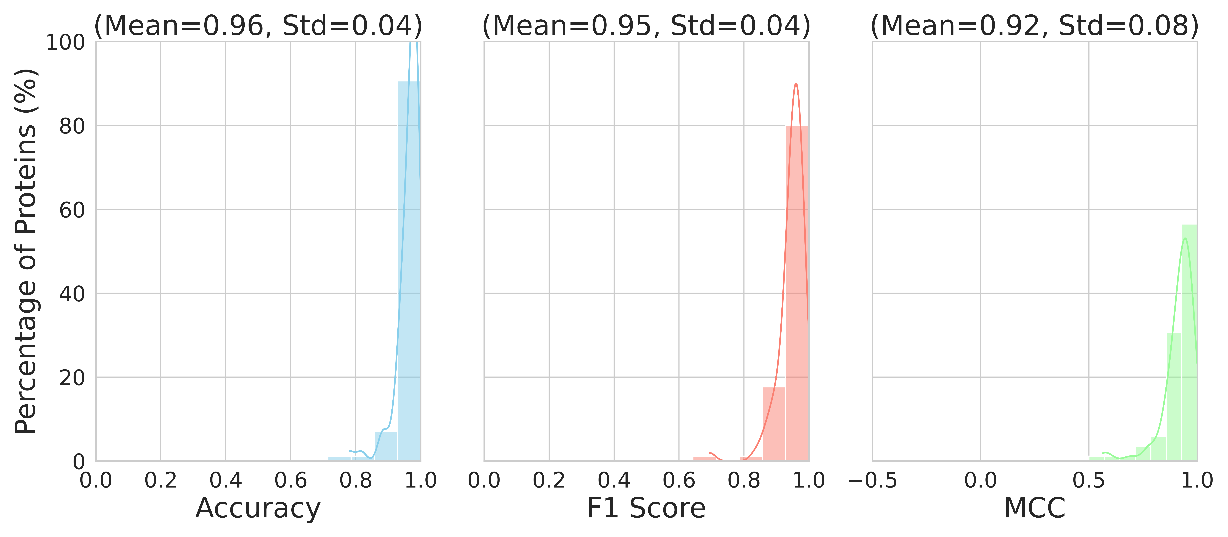


(a)


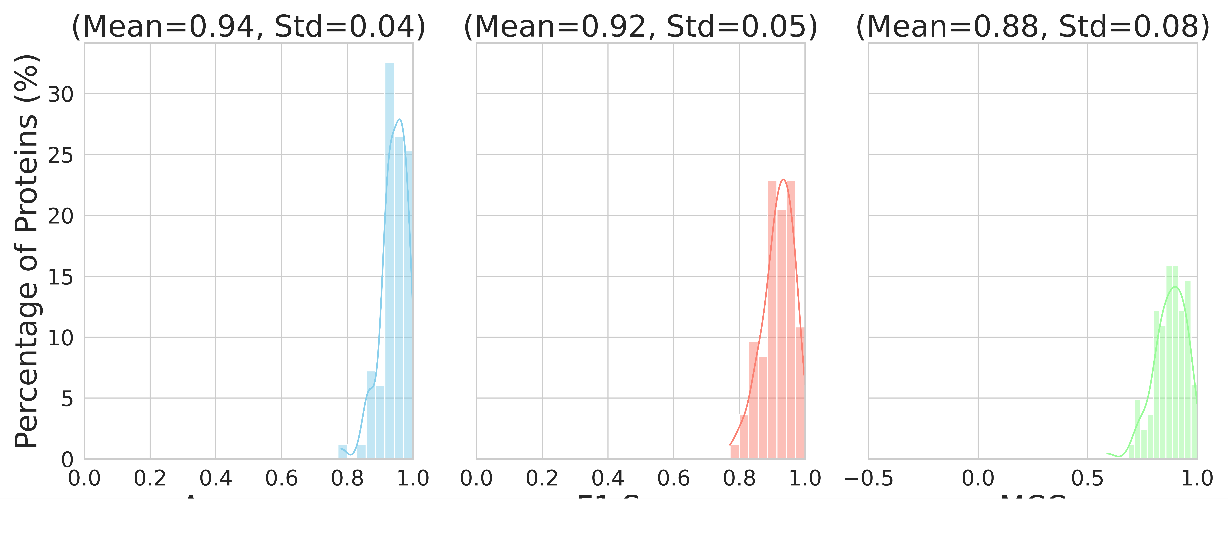


(b)


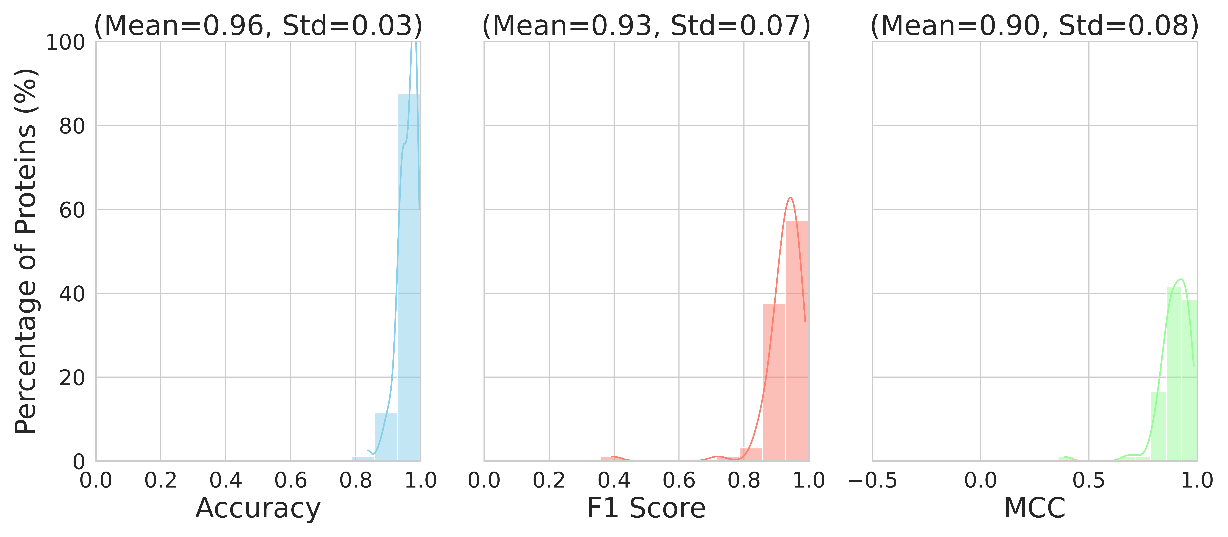


(c)

**Supplementary Figure 3** Mem MLP model with minimal feature set on test sets (a) α, (b) β, (c) Mem


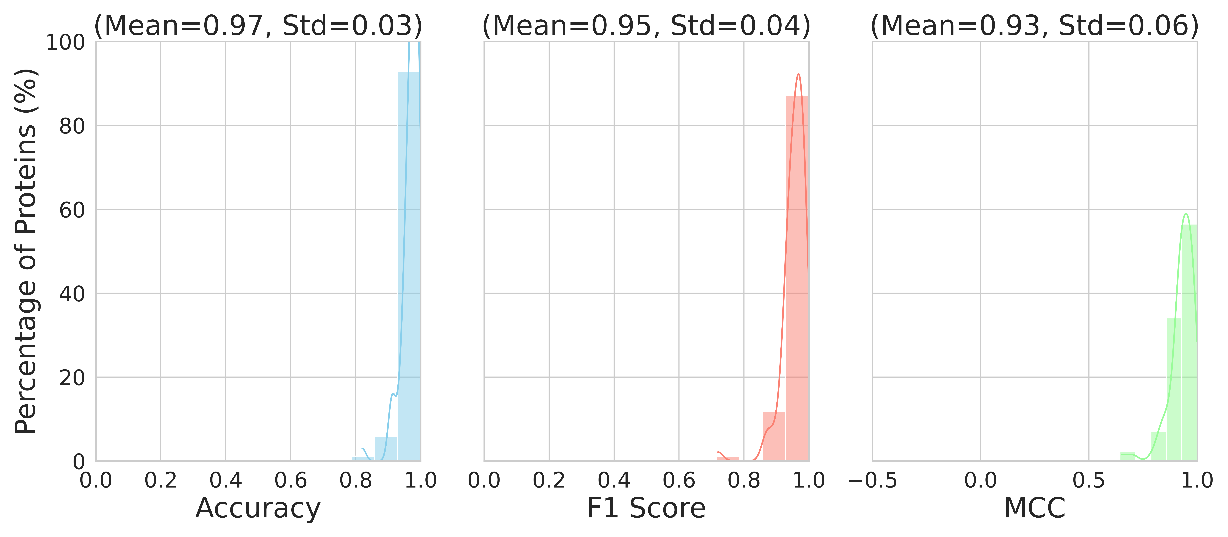


(a)


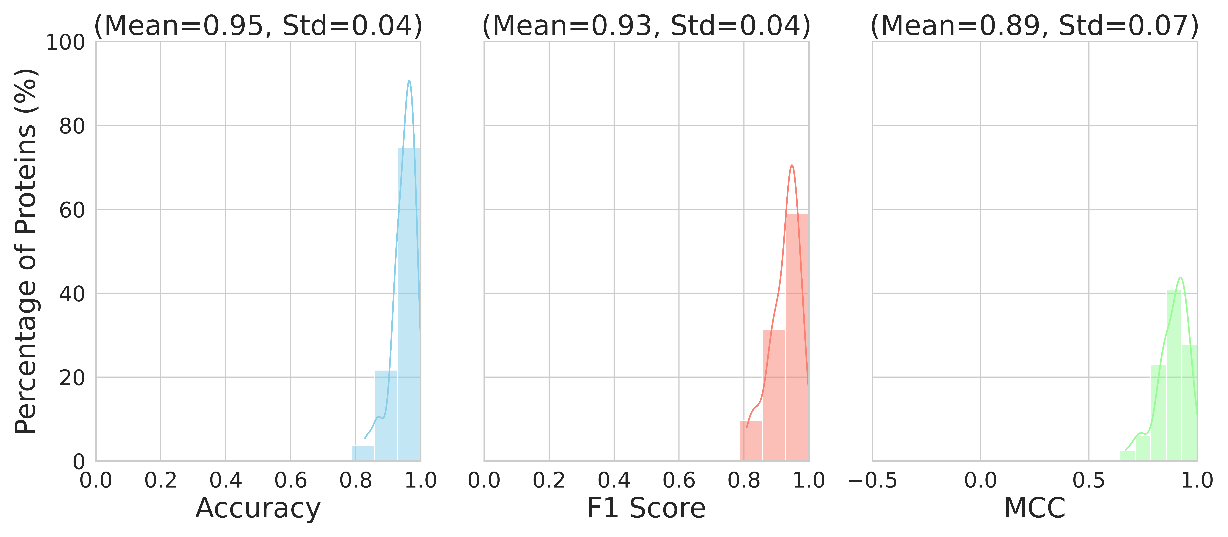


(b)


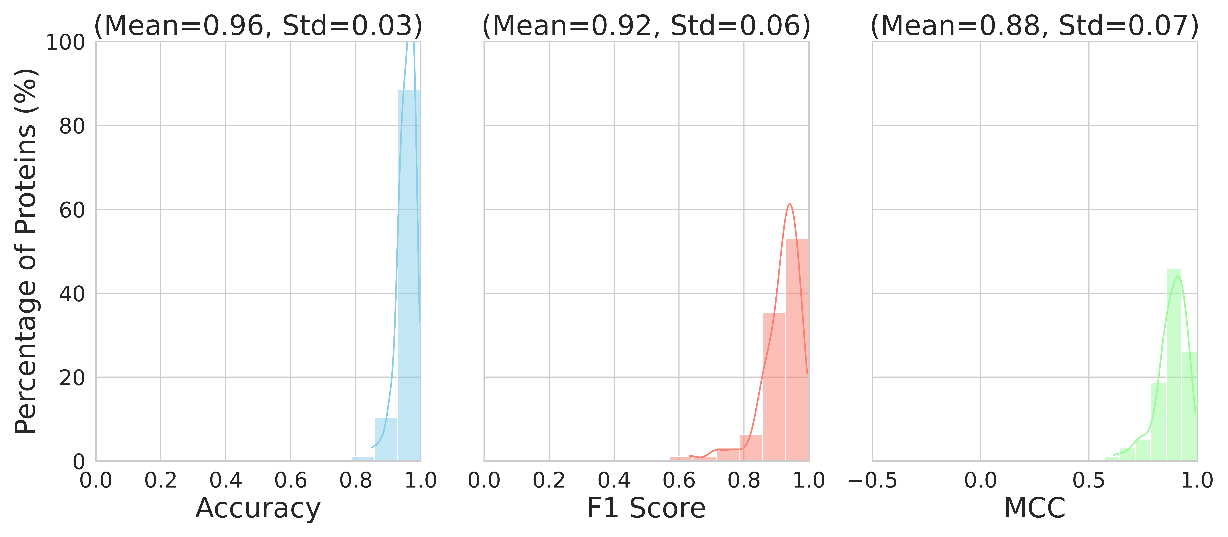


(c)

**Supplementary Figure 4** α XGBoost model with minimal feature set on test sets (a) α, (b) β, (c) Mem


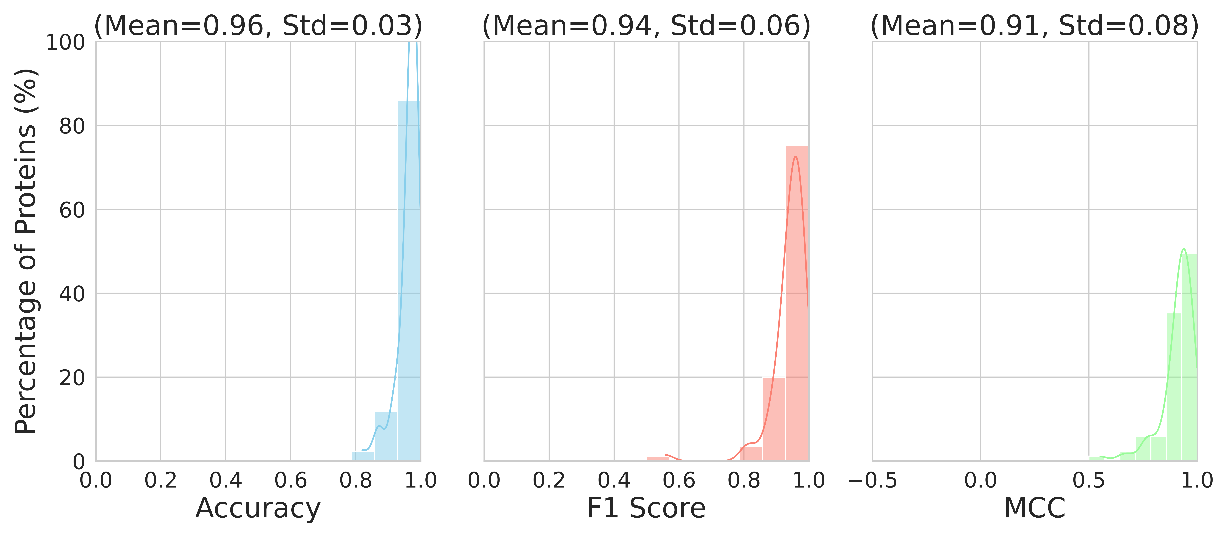


(a)


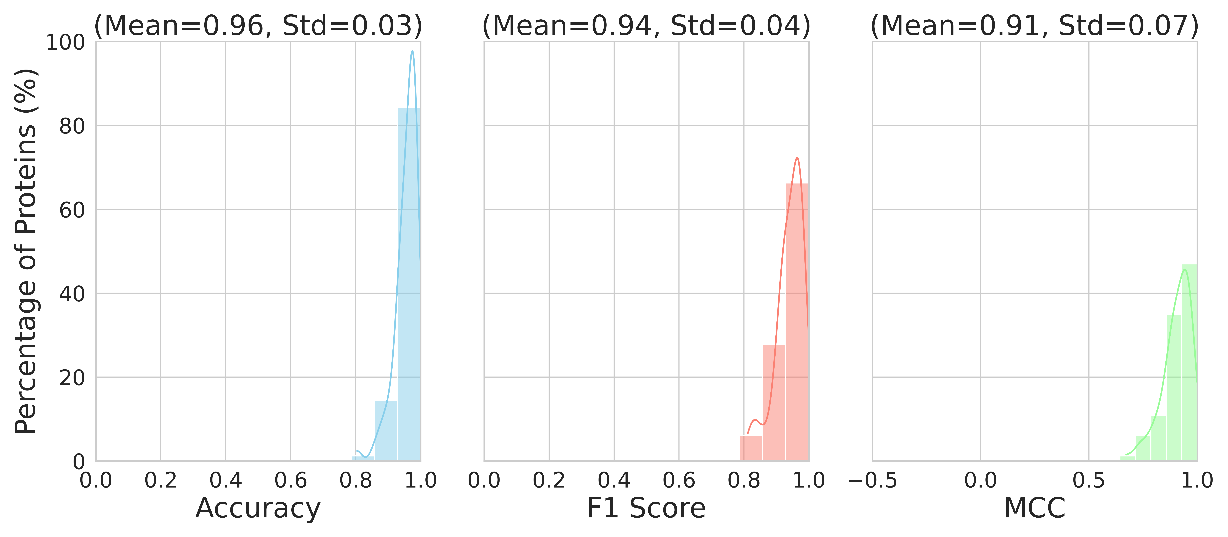


(b)


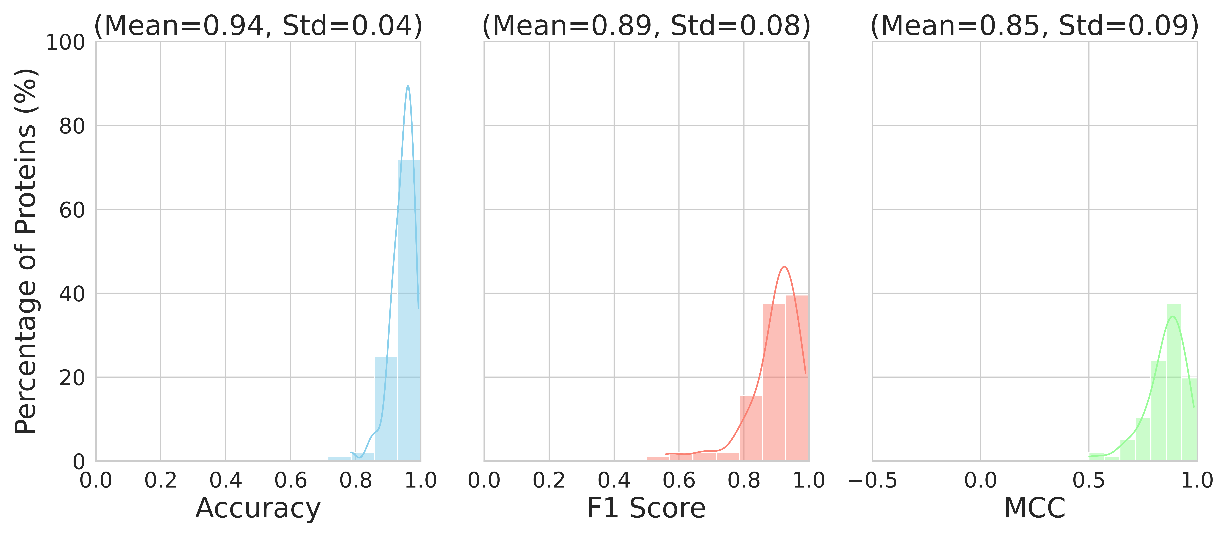


(c)

**Supplementary Figure 5** β XGBoost model with minimal feature set on test sets (a) α, (b) β, (c) Mem


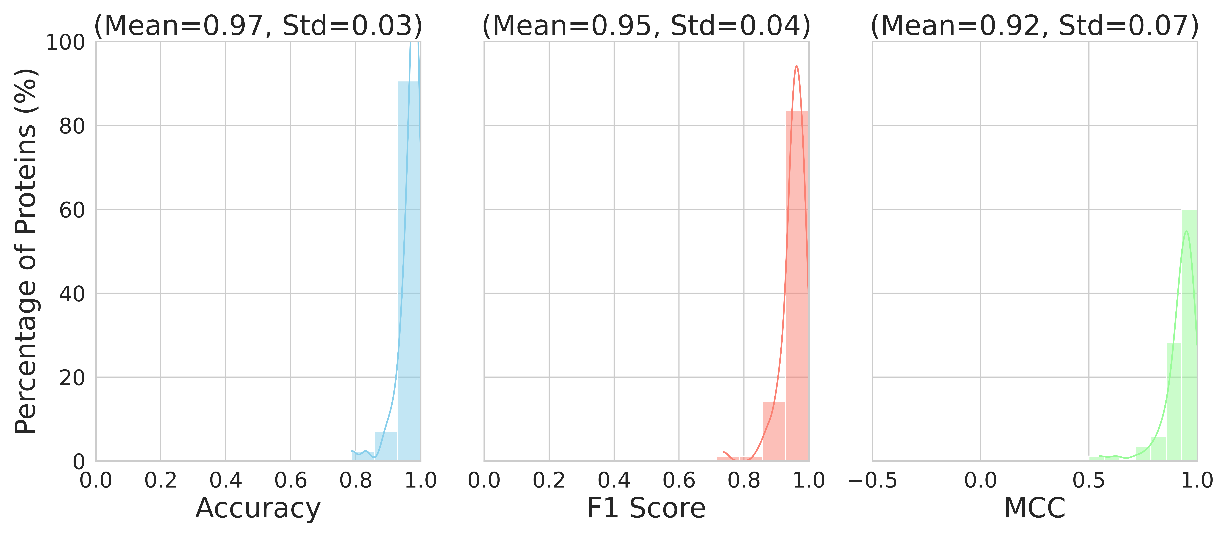


(a)


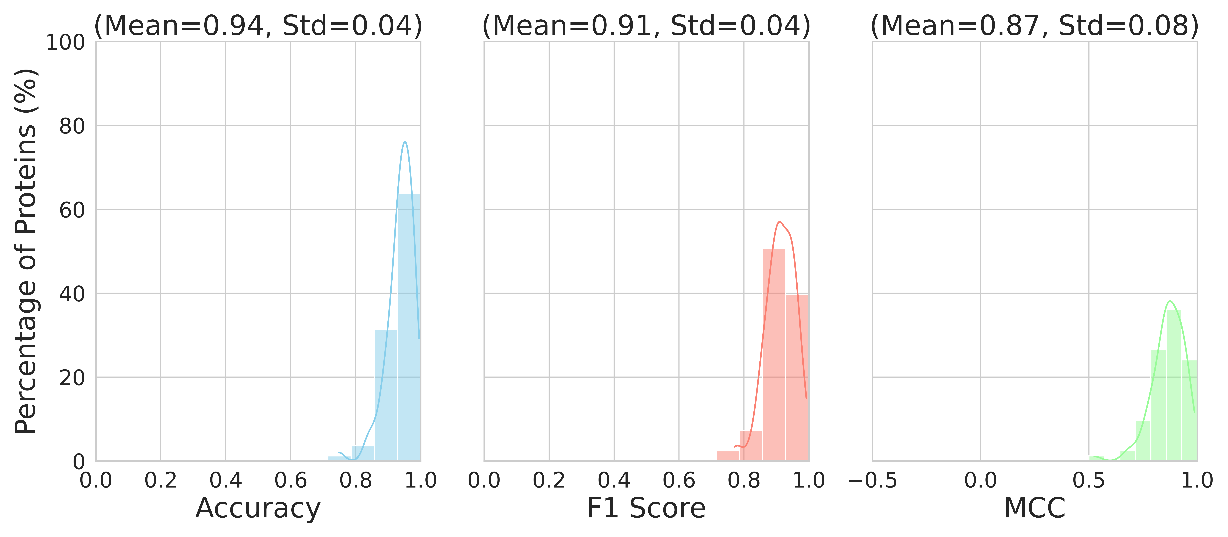


(b)


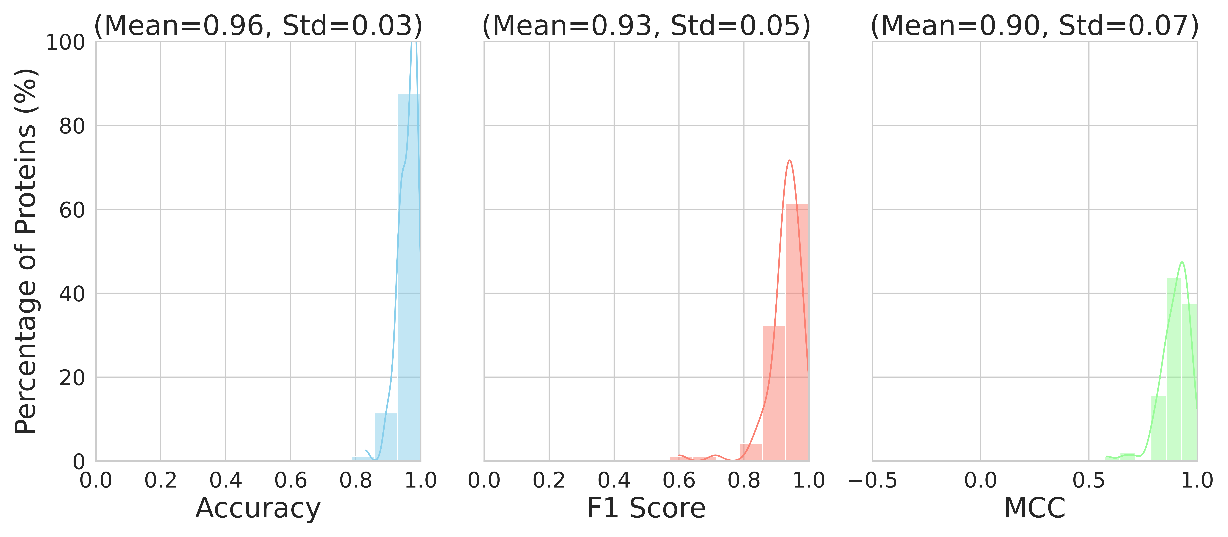


(c)

**Supplementary Figure 6** Mem XGBoost model with minimal feature set on test sets (a) α, (b) β, (c) Mem

Supplementary Table PDB id’s of the training and testing protein complexes grouped into three categories based on the secondary structure type of the interface and the surrounding environment.

| **Cytoplasmic alpha-helical Train Set** | 139l-17gs-1a17-1a43-1ae7-1afr-1aj8-1al6-1aw1-1b43-1b57-1b8g-1b9b-1btm-1chu-1csm-1d2r-1dli-1e7d-1ee1-1ee8-1ek6-1f0y-1fp3-1g6w-1gmz-1gqi-1gsz-1gu6-1h1y-1hn4-1i2n-1i45-1i4s-1iom-1is2-1iyh-1j1a-1j1j-1j93-1j9i-1jfa-1ka8-1kbl-1kcf-1kea-1kgn-1kv5-1lns-1lon-1m6j-1mo0-1n0h-1n1q-1nox-1o5x-1oc2-1orr-1oyf-1p5z-1p7n-1p9b-1pvd-1pyd-1qmg-1r2f-1req-1rqg-1rqi-1rvg-1rxq-1s9c-1sb8-1so2-1szq-1txg-1tya-1tz9-1ubv-1uda-1udu-1ukw-1ulh-1v4e-1v4v-1vgv-1via-1vip-1vjt-1w07-1w2y-1w53-1x0x-1x94-1xg7-1xng-1xqi-1xzw-1y42-1yhk-1yi8-1ynf-1yv5-1yyq-1zch-1zkw-1zl7-2a6b-2a84-2a9u-2ahr-2ao2-2b0j-2b5d-2b67-2bwj-2c20-2c5e-2cya-2dh4-2e1e-2e21-2eja-2el7-2ev1-2f1k-2flo-2fon-2g36-2g4l-2g5c-2ggl-2ggp-2gi3-2h9c-2hrc-2hun-2hvg-2i22-2inf-2isv-2iz0-2j07-2k1r-2o70-2ocp-2oej-2oma-2opi-2p5u-2pbp-2pla-2pv7-2pw3-2pzb-2qaf-2rd3-2v6k-2w8z-2xiq-2xpk-2yaz-2yy2-2yyn-2zvi-2zya-3a04-3b9r-3bem-3beo-3bnx-3bsm-3cqh-3ct2-3d4j-3der-3dg7-3dpi-3dzc-3e7d-3enk-3fef-3fiu-3fq7-3g7i-3gwl-3hfr-3hmq-3hv0-3hwk-3i4k-3i6e-3itm-3jxe-3kbp-3kdy-3kt0-3m31-3m5w-3mzn-3n2s-3nav-3npk-3nz4-3o3m-3odm-3olj-3prh-3q58-3qn3-3qtp-3r12-3r89-3rk8-3ru7-3ssa-3sz3-3tw9-3vgj-3w6z-3wdk-3wjk-4au1-4cvp-4d7a-4d8f-4f1w-4f66-4fkz-4g8t-4i71-4j5p-4j75-4jwt-4kqx-4lkq-4mpf-4n5f-4neq-4ny7-4omg-4oun-4ppu-4q16-4q9o-4qss-4ri6-4u04-4u83-4wsh-4x4w-4yh2-4yio-4ywq-4yym-5ayp-5enz-5f05-5f23-5ihx-5je8-5jef-5k3g-5k3j-5lcz-5ltf-5lvr-5mux-5o5t-5syu-5ts9-5uqo-5v0i-5vkw-5w6y-5whr-5y8g-5y9z-5zka-6a71-6at7-6bej-6byq-6cnz-6dfu-6ebo-6egk-6ep7-6ex4-6ezu-6gsb-6gza-6i2z-6iv7-6mtk-6pro-6r6u-6zjk-7axy-7e1l-7el8-7eqe-7exe-7fg6-7kvh-7m32-7my0-7my6-7n9o-7ngj-7o04-7oom-7owv-7pp7-7pt0-7pv1-7q16-7qaa-7qbk-7qoc-7qp9-7r62-7r6u-7s3z-7s76-7sfo-7tdd-7te7-7twa-7vg4-7vwe-7y0y-8czj-8dsy-8eq8-8gxl-8nse |
| --- | --- |
| **Cytoplasmic alpha-helical Test Set** | 11ba-1aok-1bmt-1bxk-1cqx-1ddz-1dvj-1e2h-1f05-1g1a-1gy8-1hti-1idt-1jk0-1jqo-1jzt-1lxy-1n1b-1n3l-1nht-1np3-1nvd-1o0w-1o17-1o5h-1ogk-1ql0-1r3q-1r8g-1tj7-1uzr-1vbm-1ww1-1y44-1yxy-2ag6-2aq0-2gf2-2gn0-2gr9-2hbv-2jas-2par-2pid-2pv3-2yy5-3cky-3f0n-3fk4-3i05-3lom-3r11-3ro6-3tze-3uu0-3zcd-4aql-4bof-4e0h-4l5l-4lzj-4mf5-5ag2-5ks7-5uq9-5wp0-6c5c-6ex3-6fqx-6ncr-6qo5-6riv-6vo2-6vso-6yka-7eqf-7lbj-7vwt-7wbr-7wxz-7wze-7yxh-7zrn-8du6-8dub |
| **Cytoplasmic beta-strand Train Set** | 1a6u-1a78-1a7n-1aaq-1at0-1b8m-1bdy-1bso-1c12-1c1f-1c5b-1cd8-1cfv-1d2s-1d5i-1d9k-1dbn-1dn0-1dqt-1eap-1eeq-1eym-1f9k-1fl3-1ggb-1gnz-1h5b-1h91-1hq4-1hza-1iam-1igi-1jfq-1jhe-1jpy-1jv5-1kcu-1l4i-1mfa-1mi8-1my5-1n7m-1nj9-1njh-1nzi-1o4t-1oaq-1opa-1ouw-1p4i-1pdg-1pfs-1q0x-1qjg-1qmj-1sda-1se8-1spp-1tza-1usc-1usr-1uww-1uxm-1uzy-1vhz-1vj2-1wlc-1wlg-1wlh-1wq9-1wz1-1xe6-1xko-1xrk-1xvs-1y0g-1yai-1yt5-1z24-1z52-1zm1-1zmi-1zso-2aq6-2ar6-2axh-2b4h-2bdr-2c11-2c7w-2ck2-2co3-2cxk-2d6k-2dud-2e5y-2f4p-2fhq-2fvu-2fyr-2gi7-2gvb-2gx9-2h1t-2h2n-2hl0-2hq7-2huh-2i02-2i45-2i9x-2iep-2imm-2imz-2in5-2nu5-2o3o-2ooj-2ook-2oov-2ox5-2ozj-2p1r-2pyt-2q03-2q3a-2r4i-2rde-2snw-2vzx-2wo0-2xr4-2y0o-2yd6-2yn3-2z77-2zdo-2zf3-2zgm-2zhp-2zmk-2zo6-35c8-3a6q-3b76-3b83-3b9i-3c2s-3c8x-3caf-3cdc-3cfx-3cnk-3cvi-3czz-3d82-3d9r-3dh5-3dui-3ec6-3ejz-3emm-3eo0-3eo6-3er7-3ew1-3f1n-3fc0-3fgy-3g5x-3gb3-3h2d-3hds-3hpe-3hqx-3hzp-3i2z-3i9i-3ia8-3ipf-3ipt-3iy4-3js1-3jx8-3khf-3knf-3kyg-3l1o-3lgj-3lgm-3lsd-3lva-3lwc-3m8c-3mit-3mqi-3nn8-3o0l-3osv-3pgz-3ps4-3q5t-3qs2-3rfh-3rnk-3sed-3snm-3soy-3szh-3u0i-3wea-3wud-3zhk-43c9-4a6s-4aj0-4apv-4auy-4axo-4azo-4b53-4be5-4c83-4dz3-4g9m-4he4-4hpk-4jvw-4lsd-4m6a-4mir-4n04-4npr-4pib-4q14-4q26-4q97-4q9c-4r4u-4rr6-4x4z-4xin-4z27-4z6j-4zno-5a3l-5a9d-5b21-5b4m-5bnc-5cxo-5dd1-5dg2-5gal-5grv-5h23-5i8e-5jdj-5jny-5mh1-5moj-5mu8-5mwj-5niv-5nld-5t4z-5tfs-5u38-5uel-5v00-5v52-5vga-5vvf-5w05-5w12-5wqv-5wsd-5x5x-5xg7-5xgt-5xhg-5xli-5xna-5xqw-5xrg-5y03-5ykv-6a76-6aq6-6avn-6b3c-6b6i-6bpb-6c0m-6cqo-6dwi-6dzn-6e20-6ebx-6f83-6gc2-6h3h-6hds-6i1o-6j9o-6kjl-6l8t-6l98-6mee-6mg4-6mkb-6n3r-6p4y-6p79-6x7h-6y0w-6ya2-6z4u-7ah1-7byu-7c8p-7ezz-7jxd-7kkz-7obf-7vzo-7xmw-8dyg |
| **Cytoplasmic beta-strand Test Set** | 12e8-1ac6-1bet-1cdt-1cqk-1dl7-1dqd-1dql-1f4w-1f86-1fh5-1h9w-1i3g-1igm-1j05-1mkk-1moe-1mqk-1py9-1q8m-1qc6-1qu0-1rur-1rzi-1tvd-1uis-1vh4-1vsc-1w6m-1xhn-1xsq-1ylx-1yzz-1zhq-1zps-2amu-2cg6-2d6l-2dct-2i2l-2ig6-2ihp-2jjw-2ns9-2oyz-2rh7-2v6h-2vkw-2vnv-3axa-3b5g-3bx9-3exu-3k8a-3knb-3m3c-3mce-3rkc-3u1s-4b96-4d4t-4ko7-4z1b-5aze-5ews-5gvy-5h9q-5mvg-5noi-5szf-5t50-5v77-5wec-5yl0-6amj-6d38-6d9g-6hgu-6niw-7c28-7jo7-7skn-7v4s |
| **Membrane Train Set** | 1aa7-1aqt-1aua-1avv-1btn-1c3i-1cdt-1dfn-1dqt-1ea5-1eys-1fhx-1hfa-1hlg-1kpl-1ktj-1kxi-1l7v-1l9b-1lpp-1m7r-1mhs-1mm9-1ots-1pfo-1py9-1q16-1qs8-1rk4-1t6m-1tu5-1umv-1v3e-1vf6-1vsg-1wdz-1xu7-1xx1-1y0g-1y5m-1z9h-1zoy-1zwx-2a65-2bs2-2c08-2cfu-2d4c-2dtc-2efk-2fic-2h4c-2h88-2hih-2hyd-2mpn-2onk-2qk7-2vsg-2wli-2x72-2xq2-2yvx-2z0v-2z73-2zup-3ajm-3b5x-3b60-3brx-3c0m-3d31-3d34-3dhw-3dhx-3dih-3fo5-3fqm-3g8g-3gro-3h90-3hl4-3hpe-3i03-3icv-3j08-3k8i-3kgc-3l1l-3lll-3m31-3nd0-3ne5-3nvo-3odj-3oe0-3org-3p0c-3p94-3pjz-3puw-3q34-3qe6-3qnq-3rbx-3rfi-3sx6-3t0r-3ukm-3utv-3w54-3wme-3x3b-3zdq-3zux-4a01-4ab0-4av3-4avm-4bdt-4bw5-4bwz-4d9o-4djh-4dkl-4fkb-4fmm-4g1u-4g33-4gpo-4h8s-4huq-4hzu-4io2-4j72-4j7c-4jch-4jkv-4mnd-4ms3-4myc-4nc9-4njn-4o6m-4o9s-4oh3-4opm-4ors-4p2p-4p42-4pl0-4q2e-4qid-4qn9-4qnd-4r0c-4r1i-4rfs-4ri2-4rng-4rp8-4ry2-4ryi-4tl3-4tqu-4u14-4v2o-4wis-4x5m-4ymu-4ysx-4zhk-5a1s-5a3v-5a40-5a43-5a50-5b57-5bov-5c73-5cmk-5d92-5dhg-5do7-5doq-5dyy-5f19-5fn3-5fqu-5fwx-5gko-5h6b-5hh0-5i6c-5i7k-5iji-5iws-5ixg-5khn-5kn7-5ly9-5mkk-5mrw-5o5e-5o9h-5oc9-5och-5oge-5on7-5oyb-5tfv-5tkg-5u1d-5uhq-5unf-5v6p-5x3x-5x5y-5x61-5xls-5xmj-5xqp-5y78-5yqq-5z1f-5zih-5zlg-5zov-6a2w-6agi-6b3i-6b87-6bgi-6bq0-6btm-6bw5-6c5w-6c9a-6cb2-6csm-6e1m-6eid-6f0k-6fnp-6fv7-6i1z-6ig4-6iql-6is6-6iu3-6jbh-6jbj-6kob-6koi-6ksi-6kuw-6l85-6lod-6m32-6m96-6mfo-6mhu-6n1g-6n51-6n52-6nf4-6npl-6nq0-6nt5-6nt6-6nwd-6oce-6oht-6p2j-6p6i-6p6j-6pnw-6pt3-6q42-6qp6-6qq5-6qti-6qv0-6qvb-6r72-6rko-6rv3-6s3k-6su3-6tej-6tek-6tqe-6uo8-6usu-6uxm-6vja-6vp0-6vqt-6vyn-6w7b-6w8n-6wk5-6wm5-6wu4-6x3v-6xdc-6xfj-6xjo-6xyu-6y9a-6ykr-6yuz-6z3y-6zg3-7ad3-7ahd-7aip-7arh-7ark-7b9f-7bp3-7bve-7bvf-7bxu-7cad-7cff-7ch1-7ch6-7chf-7cj3-7d5i-7d7q-7d7r-7d99-7dgd-7drj-7e6t-7e9h-7ehl-7epa-7epc-7epd-7ezc-7f3t-7f4f-7fh1-7jk8-7jsj-7kyo-7lb8-7lgu-7m1u-7m33-7mbz-7n58-7nkz-7occ-7ojh-7oz1-7p1k-7p34-7p54-7p5c-7p5j-7psd-7psl-7qeo-7qp9-7she-7stl-7tak-7vfi-7voj-7vr1-7vwc-7w6k-7wks-7y5g-7znu-8b4o-8dku-8f4n |
| **Membrane Test Set** | 1a25-1djt-1dxr-1g5z-1hyn-1kf6-1lbq-1oja-1pp2-1tjj-1uzg-2bdm-2bhv-2f1m-2nq2-2p0m-2q63-2qpt-2r83-2rj6-2v0o-2vpx-2x3v-3ayg-3bl8-3ebw-3fvq-3j1z-3qni-3ug9-3vne-4cz8-4czb-4djk-4kbr-4klr-4mrs-4nsw-4o6y-4on3-4qin-4qnc-4rue-4u9n-4uc1-5c76-5d3m-5jnq-5l22-5lil-5tqq-5uvg-5wd6-5xu1-5yjy-6bym-6d0j-6dz7-6e7r-6h5a-6ijz-6l3h-6l47-6m1y-6m23-6m49-6nf6-6o84-6oop-6pv7-6rtc-6w2y-6wtw-6wu3-6xjh-6y3c-6z0f-6z79-7ahc-7b1k-7b4l-7cag-7d10-7dsv-7e9g-7f73-7j7t-7m94-7rit-7rtm-7tm9-7vgf-7wiv-7wjm-7z6m-7zgo |

Supplementary Table 2 Feature Selection and Importance of α-β-Mem Dataset

| **No** | **Feature** | **Importance** |
| --- | --- | --- |
| 1 | rASA | 0.314982 |
| 2 | Cxsum_v_max_m | 0.152198 |
| 3 | Cxsum_v_wei_m | 0.090955 |
| 4 | Cxsum_f_wei_m | 0.090461 |
| 5 | Cxsum_f_avg_m | 0.047733 |
| 6 | SASA | 0.039643 |
| 7 | Cxsum_v_wei_t | 0.035912 |
| 8 | Cxsum_v_avg_m | 0.034876 |
| 9 | hydroneg_m | 0.016979 |
| 10 | Cxsum_f_max_m | 0.014972 |
| 11 | Cx_f_wei | 0.014768 |
| 12 | Cx_v_avg | 0.012695 |
| 13 | Cx_f_avg | 0.011866 |
| 14 | SASAsum_m | 0.011725 |
| 15 | Cxsum_f_wei_t | 0.009661 |
| 16 | Cx_v_wei | 0.009215 |
| 17 | SASAsum_t | 0.008082 |
| 18 | Cx_v_max | 0.008005 |
| 19 | Cxsum_v_avg_t | 0.00796 |
| 20 | Cx_f_max | 0.007854 |
| 21 | Cxsum_f_max_t | 0.00743 |
| 22 | Cxsum_v_max_t | 0.007338 |
| 23 | Cxsum_f_avg_t | 0.007208 |
| 24 | rASAsum_m | 0.00719 |
| 25 | rASAsum_t | 0.007055 |
| 26 | hydropos_m | 0.007022 |
| 27 | hydropos_t | 0.005345 |
| 28 | hydro_neg_t | 0.004784 |
| 29 | Plan_9 | 0.00124 |
| 30 | Rough_9 | 0.001141 |
| 31 | Plan_15 | 0.000609 |
| 32 | Plan_11 | 0.000596 |
| 33 | Rough_20 | 0.000579 |
| 34 | Rough_11 | 0.000543 |
| 35 | Category_Mem | 0.0004 |
| 36 | Category_Beta | 0.000344 |
| 37 | Rough_15 | 0.000334 |
| 38 | Plan_20 | 0.0003 |

Supplementary Table 3 Feature Selection and Importance of α Dataset

| **No** | **Feature** | **Importance** |
| --- | --- | --- |
| 1 | rASA | 0.298881 |
| 2 | Rough_20 | 0.163657 |
| 3 | Rough_15 | 0.122277 |
| 4 | Rough_11 | 0.081915 |
| 5 | Plan_20 | 0.068823 |
| 6 | Rough_9 | 0.057489 |
| 7 | SASA | 0.032755 |
| 8 | Plan_15 | 0.026129 |
| 9 | Cx_f_avg | 0.019774 |
| 10 | Plan_9 | 0.016214 |
| 11 | Cx_v_avg | 0.01614 |
| 12 | Cx_v_max | 0.01328 |
| 13 | Cxsum_f_avg_t | 0.01323 |
| 14 | Plan_11 | 0.012832 |
| 15 | Cxsum_v_avg_t | 0.011588 |
| 16 | Cxsum_v_avg_m | 0.011345 |
| 17 | Cxsum_f_max_t | 0.011334 |
| 18 | Cxsum_f_avg_m | 0.011271 |
| 19 | Cx_f_wei | 0.011067 |

Supplementary Table Feature Selection and Importance of Mem Dataset

| **No** | **Feature** | **Importance** |
| --- | --- | --- |
| 1 | rASA | 0.389638 |
| 2 | Plan_20 | 0.123818 |
| 3 | Rough_20 | 0.113492 |
| 4 | Rough_15 | 0.070868 |
| 5 | Plan_15 | 0.047004 |
| 6 | SASA | 0.040287 |
| 7 | Rough_11 | 0.03747 |
| 8 | Rough_9 | 0.026944 |
| 9 | Cx_f_avg | 0.020141 |
| 10 | Cx_v_avg | 0.018626 |
| 11 | Plan_11 | 0.017998 |
| 12 | Cx_f_max | 0.017364 |
| 13 | Cxsum_v_avg_m | 0.015976 |
| 14 | Plan_9 | 0.015504 |
| 15 | Cx_v_max | 0.015467 |
| 16 | SASAsum_m | 0.015237 |
| 17 | Cxsum_f_avg_m | 0.014166 |

Supplementary Table 5 Feature Importance of β Dataset

| No | Feature | Importance |
| --- | --- | --- |
| 1 | rASA | 0.195054 |
| 2 | Rough_20 | 0.158914 |
| 3 | Rough_15 | 0.133731 |
| 4 | SASA | 0.11025 |
| 5 | Rough_11 | 0.061792 |
| 6 | Plan_20 | 0.056835 |
| 7 | Rough_9 | 0.039188 |
| 8 | Plan_15 | 0.027331 |
| 9 | Cx_v_avg | 0.018339 |
| 10 | Cx_f_avg | 0.012255 |
| 11 | Plan_9 | 0.010312 |
| 12 | Cx_v_wei | 0.009632 |
| 13 | Cx_v_max | 0.009448 |
| 14 | Plan_11 | 0.009125 |
| 15 | SASAsum_m | 0.0091 |
| 16 | Cxsum_v_avg_m | 0.008986 |
| 17 | Cx_f_max | 0.008534 |
| 18 | Cx_f_wei | 0.008514 |
| 19 | Cxsum_f_avg_m | 0.008514 |
| 20 | Cxsum_v_wei_m | 0.007371 |
| 21 | hydroneg_m | 0.007189 |
| 22 | SASAsum_t | 0.007138 |
| 23 | rASAsum_m | 0.006984 |
| 24 | hydropos_m | 0.006862 |
| 25 | Cxsum_f_wei_m | 0.006636 |
| 26 | Cxsum_f_avg_t | 0.006555 |
| 27 | rASAsum_t | 0.006219 |
| 28 | Cxsum_f_max_m | 0.006154 |
| 29 | Cx_v_max_m | 0.006084 |
| 30 | Cxsum_f_max_t | 0.00594 |
| 31 | Cxsum_v_avg_t | 0.005389 |
| 32 | Cxsum_f_wei_t | 0.005061 |
| 33 | Cxsum_v_wei_t | 0.004746 |
| 34 | Cxsum_v_max_t | 0.004723 |
| 35 | hydropos_t | 0.004337 |
| 36 | hydro_neg_t | 0.004239 |
| 37 | ResType_GLY | 0.000998 |
| 38 | ResType_SER | 0.000528 |
| 39 | ResType_PRO | 0.000499 |
| 40 | ResType_ALA | 0.000495 |

Supplementary Table 6 Hyperparameters of Machine Learning Models

| **Model** | **Features** | **ML** | **Parameters** |
| --- | --- | --- | --- |
| α-β-Mem | Table 2 | RF | {'classifier__class_weight': 'balanced', 'classifier__criterion': 'entropy', 'classifier__max_depth': 30, 'classifier__min_samples_leaf': 1, 'classifier__min_samples_split': 5, 'classifier__n_estimators': 200} |
| XGBoost | {'classifier__learning_rate': 0.3, 'classifier__max_depth': 10, 'classifier__n_estimators': 200} |
| LR | {'classifier__C': 0.1, 'classifier__class_weight': 'balanced', 'classifier__penalty': 'l1', 'classifier__solver': 'saga'} |
| NB | {'classifier__var_smoothing': 1e-11} |
| MLP | {'classifier__activation': 'relu', 'classifier__alpha': 0.0001, 'classifier__hidden_layer_sizes': (74, 74), 'classifier__learning_rate': 'adaptive', 'classifier__solver': 'adam'} |
| KNN | {'classifier__metric': 'euclidean', 'classifier__n_neighbors': 5, 'classifier__weights': 'distance'} |
| α | Table 3 | RF | {'classifier__class_weight': 'balanced', 'classifier__criterion': 'entropy', 'classifier__max_depth': 20, 'classifier__min_samples_leaf': 1, 'classifier__min_samples_split': 2, 'classifier__n_estimators': 200} |
| XGBoost | {'classifier__learning_rate': 0.3, 'classifier__max_depth': 10, 'classifier__n_estimators': 200} |
| LR | {'classifier__C': 10, 'classifier__class_weight': 'balanced', 'classifier__penalty': 'l1', 'classifier__solver': 'saga'} |
| NB | {'classifier__var_smoothing': 1e-11} |
| MLP | {'classifier__activation': 'relu', 'classifier__alpha': 0.0001, 'classifier__hidden_layer_sizes': (74, 37), 'classifier__learning_rate': 'adaptive', 'classifier__solver': 'adam'} |
| KNN | {'classifier__metric': 'euclidean', 'classifier__n_neighbors': 5, 'classifier__weights': 'distance'} |
| Mem | Table 4 | RF | {'classifier__class_weight': 'balanced', 'classifier__criterion': 'entropy', 'classifier__max_depth': 30, 'classifier__min_samples_leaf': 1, 'classifier__min_samples_split': 5, 'classifier__n_estimators': 200} |
| XGBoost | {'classifier__learning_rate': 0.2, 'classifier__max_depth': 10, 'classifier__n_estimators': 200} |
| LR | {'classifier__C': 0.01, 'classifier__class_weight': 'balanced', 'classifier__penalty': 'l1', 'classifier__solver': 'saga'} |
| NB | {'classifier__var_smoothing': 1e-11} |
| MLP | {'classifier__activation': 'relu', 'classifier__alpha': 0.0001, 'classifier__hidden_layer_sizes': (74, 37), 'classifier__learning_rate': 'adaptive', 'classifier__solver': 'adam'} |
| KNN | {'classifier__metric': 'euclidean', 'classifier__n_neighbors': 7, 'classifier__weights': 'distance'} |
| β | Table 5 | RF | {'classifier__class_weight': 'balanced', 'classifier__criterion': 'entropy', 'classifier__max_depth': 20, 'classifier__min_samples_leaf': 1, 'classifier__min_samples_split': 5, 'classifier__n_estimators': 200} |
| XGBoost | {'classifier__learning_rate': 0.2, 'classifier__max_depth': 15, 'classifier__n_estimators': 200} |
| LR | {'classifier__C': 0.01, 'classifier__class_weight': 'balanced', 'classifier__penalty': 'l1', 'classifier__solver': 'saga'} |
| NB | {'classifier__var_smoothing': 1e-11} |
| MLP | {'classifier__activation': 'relu', 'classifier__alpha': 0.01, 'classifier__hidden_layer_sizes': (74, 74), 'classifier__learning_rate': 'adaptive', 'classifier__solver': 'adam'} |
| KNN | {'classifier__metric': 'manhattan', 'classifier__n_neighbors': 11, 'classifier__weights': 'distance'} |
| α-β-Mem | Table 5 | XGBoost | {'classifier__learning_rate': 0.3, 'classifier__max_depth': 15, 'classifier__n_estimators': 200} |
| MLP | {'classifier__activation': 'relu', 'classifier__alpha': 0.0001, 'classifier__hidden_layer_sizes': (74, 37), 'classifier__learning_rate': 'adaptive', 'classifier__solver': 'adam'} |
| α-β-Mem | rASA, Rough_20, Plan_20, SASA, Cx_f_avg, Plan_11 | XGBoost | {'classifier__learning_rate': 0.2, 'classifier__max_depth': 12, 'classifier__n_estimators': 200} |
| MLP | {'classifier__activation': 'tanh', 'classifier__alpha': 0.0001, 'classifier__hidden_layer_sizes': (12, 12), 'classifier__learning_rate': 'adaptive', 'classifier__solver': 'adam'} |
| α | rASA, Rough_20, Plan_20, SASA, Cx_f_avg, Plan_11 | XGBoost | {'classifier__learning_rate': 0.3, 'classifier__max_depth': 6, 'classifier__n_estimators': 200} |
| MLP | {'classifier__activation': 'relu', 'classifier__alpha': 0.0001, 'classifier__hidden_layer_sizes': (12, 6), 'classifier__learning_rate': 'adaptive', 'classifier__solver': 'adam'} |
| β | rASA, Rough_20, Plan_20, SASA, Cx_f_avg, Plan_11 | XGBoost | {'classifier__learning_rate': 0.1, 'classifier__max_depth': 6, 'classifier__n_estimators': 100} |
| MLP | {'classifier__activation': 'relu', 'classifier__alpha': 0.01, 'classifier__hidden_layer_sizes': (12, 12), 'classifier__learning_rate': 'adaptive', 'classifier__solver': 'adam'} |
| Mem | rASA, Rough_20, Plan_20, SASA, Cx_f_avg, Plan_11 | XGBoost | {'classifier__learning_rate': 0.2, 'classifier__max_depth': 12, 'classifier__n_estimators': 200} |
| MLP | {'classifier__activation': 'relu', 'classifier__alpha': 0.0001, 'classifier__hidden_layer_sizes': (12, 6), 'classifier__learning_rate': 'adaptive', 'classifier__solver': 'adam'} |

Supplementary Table 7 Evaluation of α Model on Protein Structure Categories α, β, Mem using Features Listed in Supplementary Table 3

| **ML-Test** | **Accuracy** | **Precision** | **Recall** | **Specificity** | **F1-score** | **MCC** | **ROC AUC** |
| --- | --- | --- | --- | --- | --- | --- | --- |
| XGBoost-α | 0.9745 | 0.9805 | 0.9435 | 0.9904 | 0.9617 | 0.9429 | 0.9935 |
| XGBoost-β | 0.9509 | 0.9617 | 0.9009 | 0.9795 | 0.9303 | 0.8936 | 0.9844 |
| XGBoost-Mem | 0.955 | 0.9636 | 0.8844 | 0.9856 | 0.9223 | 0.8924 | 0.9828 |
| MLP-α | 0.9739 | 0.9864 | 0.936 | 0.9934 | 0.9605 | 0.9418 | 0.9942 |
| MLP-β | 0.9442 | 0.966 | 0.8776 | 0.9823 | 0.9197 | 0.8795 | 0.9835 |
| MLP-Mem | 0.8539 | 0.9702 | 0.5322 | 0.9929 | 0.6873 | 0.6485 | 0.8001 |

Supplementary Table 8 Evaluation of Mem Model on Protein Structure Categories α, β, Mem using Features Listed in Supplementary Table 4

| **ML-Test** | **Accuracy** | **Precision** | **Recall** | **Specificity** | **F1-score** | **MCC** | **ROC AUC** |
| --- | --- | --- | --- | --- | --- | --- | --- |
| XGBoost-α | 0.9673 | 0.98 | 0.9223 | 0.9903 | 0.9503 | 0.9268 | 0.9921 |
| XGBoost-β | 0.9501 | 0.9798 | 0.881 | 0.9896 | 0.9278 | 0.8928 | 0.9847 |
| XGBoost-Mem | 0.9628 | 0.9597 | 0.915 | 0.9834 | 0.9368 | 0.911 | 0.9892 |
| MLP-α | 0.9702 | 0.984 | 0.9273 | 0.9923 | 0.9548 | 0.9336 | 0.9928 |
| MLP-β | 0.9506 | 0.9808 | 0.8813 | 0.9901 | 0.9284 | 0.8938 | 0.9868 |
| MLP-Mem | 0.9624 | 0.9561 | 0.9175 | 0.9818 | 0.9364 | 0.9101 | 0.9898 |

Supplementary Table 9 Evaluation of β Model on Protein Structure Categories α, β, Mem using Features Listed in Table 2

| **ML-Test** | **Accuracy** | **Precision** | **Recall** | **Specificity** | **F1-score** | **MCC** | **ROC AUC** |
| --- | --- | --- | --- | --- | --- | --- | --- |
| XGBoost-α | 0.9635 | 0.9705 | 0.9204 | 0.9856 | 0.9448 | 0.9183 | 0.9905 |
| XGBoost-β | 0.9663 | 0.96 | 0.9469 | 0.9774 | 0.9534 | 0.9271 | 0.9906 |
| XGBoost-Mem | 0.9444 | 0.915 | 0.8994 | 0.9639 | 0.9071 | 0.8675 | 0.9831 |
| MLP-α | 0.9657 | 0.966 | 0.9316 | 0.9832 | 0.9485 | 0.9231 | 0.9917 |
| MLP-β | 0.9657 | 0.9601 | 0.9451 | 0.9775 | 0.9526 | 0.9258 | 0.9899 |
| MLP-Mem | 0.9421 | 0.8985 | 0.9111 | 0.9555 | 0.9047 | 0.8632 | 0.9834 |

Supplementary Table 10 Evaluation of α-β-Mem Model on Protein Categories using Features Intersection between α and Mem Listed in Table 2

| **ML-Test** | **Accuracy** | **Precision** | **Recall** | **Specificity** | **F1-score** | **MCC** | **ROC AUC** |
| --- | --- | --- | --- | --- | --- | --- | --- |
| XGBoost-α-β-Mem | 0.9683 | 0.975 | 0.9263 | 0.9886 | 0.95 | 0.9275 | 0.9916 |
| XGBoost-α | 0.9746 | 0.9846 | 0.9398 | 0.9924 | 0.9617 | 0.9433 | 0.994 |
| XGBoost-β | 0.9664 | 0.9753 | 0.9312 | 0.9865 | 0.9527 | 0.9273 | 0.9898 |
| XGBoost-Mem | 0.9649 | 0.9679 | 0.914 | 0.9869 | 0.9402 | 0.9161 | 0.9906 |
| MLP-α-β-Mem | 0.9666 | 0.9681 | 0.928 | 0.9852 | 0.9476 | 0.9236 | 0.991 |
| MLP-α | 0.9729 | 0.9806 | 0.9386 | 0.9905 | 0.9592 | 0.9394 | 0.9935 |
| MLP-β | 0.965 | 0.9695 | 0.9332 | 0.9832 | 0.951 | 0.9243 | 0.9901 |
| MLP-Mem | 0.9632 | 0.9582 | 0.9179 | 0.9827 | 0.9376 | 0.9119 | 0.9895 |
